# Supplementary figures and images for: How to find home backwards? Navigation during rearward homing of Cataglyphis fortis desert ants
Source: Oxford University Press journal article supplement (doi:10.1242/jeb.137786), 2016-07-15

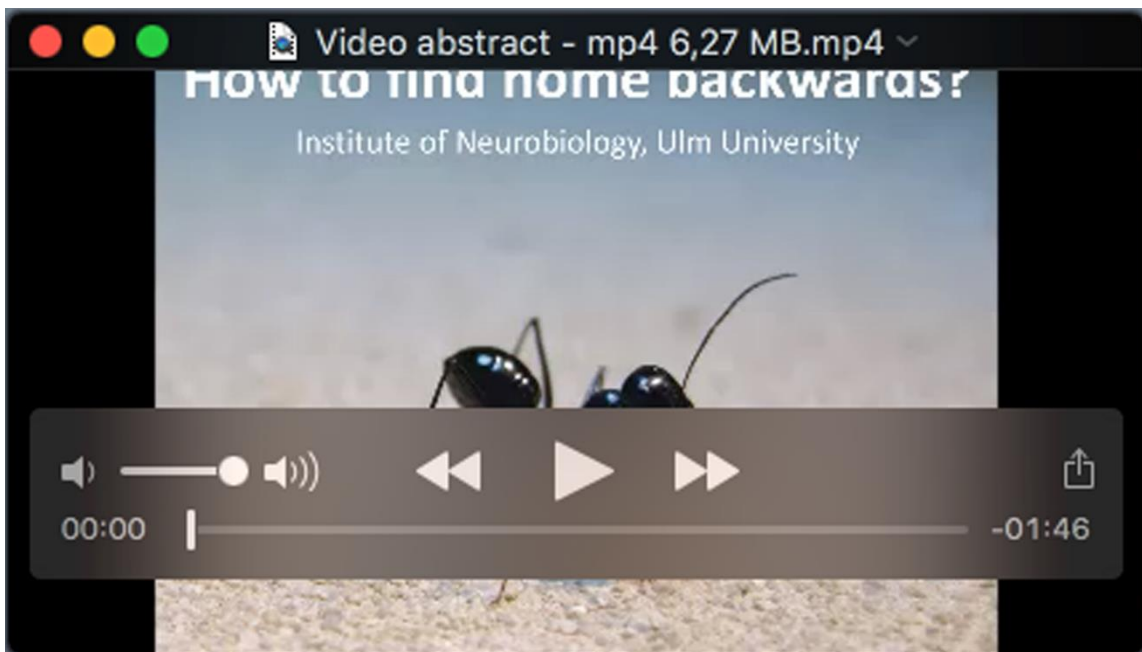

Supplement: jeb137786supp1.pdf [file jeb137786supp1.pdf]
